# Supplementary material for: Post-tetanic potentiation lowers the energy barrier for synaptic vesicle fusion independently of Synaptotagmin-1
Source: eLife. 2020 Aug 24;9:e55713. doi: 10.7554/eLife.55713 (PMC7500951; doi:10.7554/eLife.55713)
Supplement: Figure 1—figure supplement 1—source data 1. [file elife-55713-fig1-figsupp1-data1.xlsx]

## Sheet: Sheet1
Figure	Genotype	Median	MAD	Mean	SEM	N (weeks)	n (cells)	Primary test	pValue	zval	rank	Between groups test (when applicable)	pValue	zval	rank
Figure 1 Supplement 1
'Docked vesicles per synapse'	'WT'	10.0952	0.916667	9.86786	0.608847		6	Wilcoxon rank sum test	0.002331		62
'Docked vesicles per synapse'	'KO'	6.44444	0.966184	6.597	0.372016		7
'AZ length (nm)'	'WT'	579.11	42.274	575.697	20.067		6	Wilcoxon rank sum test	0.0011655		63
'AZ length (nm)'	'KO'	426.002	36.9395	414.453	19.0551		7
'Docked vesicles per nm AZ'	'WT'	0.0178539	0.00146663	0.0173272	0.000877003		6	Wilcoxon rank sum test	0.5338		47
'Docked vesicles per nm AZ'	'KO'	0.0170006	0.000826141	0.0166491	0.000581097		7
'Total vesicles per synapse'	'WT'	148.216	26.3938	147.653	10.9139		6	Wilcoxon rank sum test	0.013986		59
'Total vesicles per synapse'	'KO'	90.963	14.4074	93.3974	7.49657		7
