# Supplementary material for: Post-tetanic potentiation lowers the energy barrier for synaptic vesicle fusion independently of Synaptotagmin-1
Source: eLife. 2020 Aug 24;9:e55713. doi: 10.7554/eLife.55713 (PMC7500951; doi:10.7554/eLife.55713)
Supplement: Figure 1—figure supplement 2—source data 1. [file elife-55713-fig1-figsupp2-data1.xlsx]

## Sheet: Sheet1
Figure	Genotype	Median	MAD	Mean	SEM	N (weeks)	n (cells)	Primary test	pValue	zval	rank	Between groups test (when applicable)	pValue	zval	rank
Figure 1 Supplement 2
HS integral (nC)'	WT 250mM	1.44339	0.713567	2.00953	0.37939	4	27	Wilcoxon rank sum test	0.539331	0.613825	764
HS integral (nC)'	KO 250mM	1.27221	0.475235	1.46621	0.172962	4	26	[]	[]	[]	[]
HS integral (nC)'	WT 500mM	2.76426	1.44671	4.75214	0.824641	4	27	Wilcoxon rank sum test	0.715308	0.364736	750
HS integral (nC)'	KO 500mM	3.38108	1.30778	3.28916	0.364498	4	26	[]	[]	[]	[]
HS integral (nC)'	WT 750mM	2.61482	0.614642	2.33741	0.394699	2	9	Wilcoxon rank sum test	0.814809	[]	78
HS integral (nC)'	KO 750mM	2.58681	0.725628	2.40166	0.35134	2	8	[]	[]	[]	[]
HS integral (nC)'	WT 1000mM	2.24616	0.18274	2.19986	0.4269	2	7	Wilcoxon rank sum test	0.317599	[]	44
HS integral (nC)'	KO 1000mM	2.79697	0.221486	2.41237	0.304166	2	7	[]	[]	[]	[]
'10-90% Rise time (s)'	WT 250mM	0.6821	0.2175	0.767463	0.0587331	4	27	Wilcoxon rank sum test	0.516074	-0.649409	692
'10-90% Rise time (s)'	KO 250mM	0.74065	0.2047	0.840031	0.072715	4	26	[]	[]	[]	[]
'10-90% Rise time (s)'	WT 500mM	0.2801	0.0366	0.299793	0.0166776	4	27	Wilcoxon rank sum test	0.000385953	-3.54951	529
'10-90% Rise time (s)'	KO 500mM	0.3607	0.05465	0.430335	0.0342215	4	26	[]	[]	[]	[]
'10-90% Rise time (s)'	WT 750mM	0.1642	0.0276	0.161189	0.0118145	2	9	Wilcoxon rank sum test	0.00246812	[]	51
'10-90% Rise time (s)'	KO 750mM	0.21915	0.01385	0.215987	0.00904438	2	8	[]	[]	[]	[]
'10-90% Rise time (s)'	WT 1000mM	0.1343	0.0279	0.148757	0.0243702	2	7	Wilcoxon rank sum test	0.0728438	[]	38
'10-90% Rise time (s)'	KO 1000mM	0.1959	0.0203	0.194243	0.00937961	2	7	[]	[]	[]	[]
'Delay of HS onset (s)'	WT 250mM	1.05429	0.167098	1.07751	0.044999	4	27	Wilcoxon rank sum test	0.0796855	1.75251	828
'Delay of HS onset (s)'	KO 250mM	0.950894	0.202903	0.969447	0.0479793	4	26	[]	[]	[]	[]
'Delay of HS onset (s)'	WT 500mM	0.984615	0.13589	1.01496	0.0412144	4	27	Wilcoxon rank sum test	0.563102	-0.578241	696
'Delay of HS onset (s)'	KO 500mM	0.967066	0.104754	1.07326	0.0531061	4	26	[]	[]	[]	[]
'Delay of HS onset (s)'	WT 750mM	0.737946	0.0842457	0.73286	0.0349086	2	9	Wilcoxon rank sum test	0.742986	[]	77
'Delay of HS onset (s)'	KO 750mM	0.719232	0.0212418	0.743561	0.018994	2	8	[]	[]	[]	[]
'Delay of HS onset (s)'	WT 1000mM	0.658108	0.089818	0.694779	0.0471299	2	7	Wilcoxon rank sum test	0.901515	[]	54
'Delay of HS onset (s)'	KO 1000mM	0.653806	0.0402469	0.741338	0.0678929	2	7	[]	[]	[]	[]
'Fitted RRP (nC)'	WT 500mM	1.90643	1.02514	3.14022	0.531668	4	27	Wilcoxon rank sum test	0.350262	0.934081	782
'Fitted RRP (nC)'	KO 500mM	2.04877	0.741771	1.90388	0.208868	4	26	[]	[]	[]	[]
'Fitted RRP (nC)'	WT 750mM	1.49651	0.38267	1.5109	0.220566	2	9	Wilcoxon rank sum test	0.423447	[]	90
'Fitted RRP (nC)'	KO 750mM	1.17659	0.321817	1.20848	0.149042	2	8	[]	[]	[]	[]
'Fitted RRP (nC)'	WT 1000mM	1.43164	0.536616	1.50393	0.231701	2	7	Wilcoxon rank sum test	0.382867	[]	60
'Fitted RRP (nC)'	KO 1000mM	1.25517	0.190737	1.2136	0.103878	2	7	[]	[]	[]	[]
'Time-to-peak (s)'	WT 250mM	2.0741	0.5153	2.08042	0.116972	4	27	Wilcoxon rank sum test	0.527637	0.631617	765
'Time-to-peak (s)'	KO 250mM	2.0083	0.47155	1.98252	0.120133	4	26	[]	[]	[]	[]
'Time-to-peak (s)'	WT 500mM	1.1786	0.1604	1.23267	0.0505596	4	27	Wilcoxon rank sum test	0.179176	-1.3433	653
'Time-to-peak (s)'	KO 500mM	1.25815	0.1686	1.38027	0.0681033	4	26	[]	[]	[]	[]
'Time-to-peak (s)'	WT 750mM	0.8288	0.1012	0.823644	0.0356738	2	9	Wilcoxon rank sum test	0.321267	[]	70
'Time-to-peak (s)'	KO 750mM	0.86695	0.03265	0.879212	0.0201997	2	8	[]	[]	[]	[]
'Time-to-peak (s)'	WT 1000mM	0.7459	0.053	0.756814	0.0411176	2	7	Wilcoxon rank sum test	0.710373	[]	49
'Time-to-peak (s)'	KO 1000mM	0.7527	0.031	0.843414	0.0740044	2	7	[]	[]	[]	[]
'Time-to-peak - delay (s)'	WT 250mM	0.821349	0.331823	1.00291	0.0894206	4	27	Wilcoxon rank sum test	0.769088	-0.293568	712
'Time-to-peak - delay (s)'	KO 250mM	0.9496	0.291362	1.01307	0.0776265	4	26	[]	[]	[]	[]
'Time-to-peak - delay (s)'	WT 500mM	0.218496	0.0442609	0.217715	0.0134435	4	27	Wilcoxon rank sum test	0.00256347	-3.01575	559
'Time-to-peak - delay (s)'	KO 500mM	0.271498	0.0552417	0.307008	0.0286198	4	26	[]	[]	[]	[]
'Time-to-peak - delay (s)'	WT 750mM	0.0860545	0.0218794	0.090784	0.00813563	2	9	Wilcoxon rank sum test	0.0206499	[]	57
'Time-to-peak - delay (s)'	KO 750mM	0.134231	0.0343792	0.135651	0.0119336	2	8	[]	[]	[]	[]
'Time-to-peak - delay (s)'	WT 1000mM	0.0676921	0.0173315	0.062035	0.0128419	2	7	Wilcoxon rank sum test	0.0973193	[]	39
'Time-to-peak - delay (s)'	KO 1000mM	0.0889304	0.0238669	0.102076	0.0141284	2	7	[]	[]	[]	[]
