# Supplementary material for: Post-tetanic potentiation lowers the energy barrier for synaptic vesicle fusion independently of Synaptotagmin-1
Source: eLife. 2020 Aug 24;9:e55713. doi: 10.7554/eLife.55713 (PMC7500951; doi:10.7554/eLife.55713)
Supplement: Figure 1—source data 1. [file elife-55713-fig1-data1.xlsx]

## Sheet: Sheet1
Figure	Genotype	Median	MAD	Mean	SEM	N (weeks)	n (cells)	Primary test	pValue	zval	rank	Between groups test (when applicable)	pValue	zval	rank
Figure 1
'Number of synapses'	'WT'	404	147	452.474	57.7551	1	19	Wilcoxon rank sum test	0.81121	-0.238866	371
'Number of synapses'	'KO'	395.5	175.5	488.55	59.1408	1	20
'Dendrite length (mm)'	'WT'	1.79465	0.366045	1.98374	0.18847	1	19	Wilcoxon rank sum test	0.132782	1.50322	434
'Dendrite length (mm)'	'KO'	1.444	0.248911	1.61488	0.110828	1	20
'mEPSC frequency (Hz)'	'WT'	5.84538	2.7892	9.36779	2.17762	4	24	Wilcoxon rank sum test	0.00050233	-3.47951	412
'mEPSC frequency (Hz)'	'KO'	18.5526	12.0268	23.8438	3.51496	4	23
'EPSC Charge (pC)'	'WT'	111.307	58.5594	144.438	26.0025	4	28	Wilcoxon rank sum test	7.01664e-05	3.97572	1082
'EPSC Charge (pC)'	'KO'	25.4332	18.0303	41.7152	8.02472	4	30
'RRP (nC)'	'WT'	1.90643	1.02514	3.14022	0.531668	4	27	Wilcoxon rank sum test	0.350262	0.934081	782
'RRP (nC)'	'KO'	2.04877	0.741771	1.90388	0.208868	4	26
'Release_{250} / Pool_{500}'	'WT'	0.536229	0.234448	0.518182	0.0476052	4	27	Wilcoxon rank sum test	0.662906	0.435904	754
'Release_{250} / Pool_{500}'	'KO'	0.477518	0.118359	0.489466	0.0294956	4	26
'0mM k_{2,max} (s^{-1})'	'WT'	0.000198549	0.000157306	0.00038094	0.000112355	4	24	Wilcoxon rank sum test	7.21799e-05	-3.96898	389
'0mM k_{2,max} (s^{-1})'	'KO'	0.00114373	0.000876605	0.00140615	0.000240116	4	23
'250mM k_{2,max} (s^{-1})'	'WT'	0.259671	0.16603	0.23896	0.0326262	4	27	Wilcoxon rank sum test	0.637292	-0.471488	702
'250mM k_{2,max} (s^{-1})'	'KO'	0.232993	0.0913972	0.235165	0.0225036	4	26
'500mM k_{2,max} (s^{-1})'	'WT'	2.20384	0.591843	2.59862	0.198401	4	27	Wilcoxon rank sum test	0.0453276	2.0016	842
'500mM k_{2,max} (s^{-1})'	'KO'	1.94101	0.421129	1.98835	0.131062	4	26
'750mM k_{2,max} (s^{-1})'	'WT'	6.58879	1.42323	6.52052	0.63646	2	9	Wilcoxon rank sum test	0.0152201		106
'750mM k_{2,max} (s^{-1})'	'KO'	4.05167	1.00072	4.35224	0.515829	2	8
'1000mM k_{2,max} (s^{-1})'	'WT'	8.35998	2.27959	8.33743	0.782781	2	7	Wilcoxon rank sum test	0.0973193		66
'1000mM k_{2,max} (s^{-1})'	'KO'	6.7396	1.32318	6.28455	0.843138	2	7
'0mM ΔE_a (RT)'	'WT'	-0.162763	0.828423	0	0.290817	4	24	Wilcoxon rank sum test	7.21799e-05
'0mM ΔE_a (RT)'	'KO'	-1.52854	0.796295	-1.30597	0.219082	4	23
'250mM ΔE_a (RT)'	'WT'	-6.82172	0.718219	-6.44141	0.162185	4	27	Wilcoxon rank sum test	0.637292
'250mM ΔE_a (RT)'	'KO'	-6.54587	0.358331	-6.4254	0.106735	4	26
'500mM ΔE_a (RT)'	'WT'	-8.74117	0.301981	-8.82785	0.0788709	4	27	Wilcoxon rank sum test	0.0453276
'500mM ΔE_a (RT)'	'KO'	-8.6054	0.228175	-8.56017	0.0806264	4	26
'750mM ΔE_a (RT)'	'WT'	-9.79494	0.243356	-9.74782	0.0951455	2	9	Wilcoxon rank sum test	0.0152201
'750mM ΔE_a (RT)'	'KO'	-9.30295	0.25693	-9.34356	0.117619	2	8
'1000mM ΔE_a (RT)'	'WT'	-10.0239	0.255143	-9.99362	0.0969052	2	7	Wilcoxon rank sum test	0.0973193
'1000mM ΔE_a (RT)'	'KO'	-9.8412	0.218566	-9.71096	0.146254	2	7
