# Supplementary material for: Post-tetanic potentiation lowers the energy barrier for synaptic vesicle fusion independently of Synaptotagmin-1
Source: eLife. 2020 Aug 24;9:e55713. doi: 10.7554/eLife.55713 (PMC7500951; doi:10.7554/eLife.55713)
Supplement: Figure 2—figure supplement 1—source data 1. [file elife-55713-fig2-figsupp1-data1.xlsx]

## Sheet: Sheet1
Figure	Genotype	Median	MAD	Mean	SEM	N (weeks)	n (cells)	Primary test	pValue	zval	rank	Between groups test (when applicable)	pValue	zval	rank
Figure 2 Supplement 1
'Syt-1 normalized to VAMP2'	'WT'	0.973101	0.137747	0.963432	0.0422937	2	22
'Syt-1 normalized to VAMP2'	'KO'	0.0957173	0.0866948	0.163801	0.0317497	2	21	Wilcoxon rank sum test (compared to WT)	2.13934e-08	5.60034	715
'Syt-1 normalized to VAMP2'	'Syt1 WT'	1.98436	0.373576	2.01333	0.158041	2	23	Wilcoxon rank sum test (compared to WT)	2.45961e-06	-4.71145	298
'Syt-1 normalized to VAMP2'	'Syt1 9Pro'	1.52094	0.43166	1.78497	0.165984	2	24	Wilcoxon rank sum test (compared to WT)	6.21501e-06	-4.51894	311
'Syt-1 normalized to VAMP2'	'Syt1 DN'	1.7603	0.372148	1.83897	0.10325	2	24	Wilcoxon rank sum test (compared to WT)	5.9423e-08	-5.42053	270
