# Supplementary material for: Post-tetanic potentiation lowers the energy barrier for synaptic vesicle fusion independently of Synaptotagmin-1
Source: eLife. 2020 Aug 24;9:e55713. doi: 10.7554/eLife.55713 (PMC7500951; doi:10.7554/eLife.55713)
Supplement: Figure 2—figure supplement 2—source data 1. [file elife-55713-fig2-figsupp2-data1.xlsx]

## Sheet: Sheet1
Figure	Genotype	Median	MAD	Mean	SEM	N (weeks)	n (cells)	Primary test	pValue	zval	rank	Between groups test (when applicable)	pValue	zval	rank
Figure 2 Supplement 2
'HS integral (nC)'	WT 250mM'	1.57073	0.636768	1.93927	0.286908	7	17	Wilcoxon rank sum test	0.482413	0.702427	309
'HS integral (nC)'	9Pro 250mM'	1.40644	0.625466	1.9767	0.461731	6	16	[]	[]	[]	[]
'HS integral (nC)'	WT 500mM'	3.39864	1.37096	4.51326	0.777967	7	19	Wilcoxon rank sum test	0.86727	0.167128	367
'HS integral (nC)'	9Pro 500mM'	3.68406	1.98103	4.61693	0.828223	6	18	[]	[]	[]	[]
'10-90% Rise time (s)'	WT 250mM'	0.5291	0.0917	0.571918	0.0383713	7	17	Wilcoxon rank sum test	0.505152	-0.666405	270
'10-90% Rise time (s)'	9Pro 250mM'	0.64445	0.16035	0.630981	0.0492481	6	16	[]	[]	[]	[]
'10-90% Rise time (s)'	WT 500mM'	0.2802	0.0367	0.273084	0.0119057	7	19	Wilcoxon rank sum test	0.681643	-0.410223	347
'10-90% Rise time (s)'	9Pro 500mM'	0.28285	0.0351	0.284011	0.0126658	6	18	[]	[]	[]	[]
'Delay of HS onset (s)'	WT 250mM'	1.38955	0.215983	1.48576	0.112575	7	17	Wilcoxon rank sum test	0.601449	0.522318	304
'Delay of HS onset (s)'	9Pro 250mM'	1.24983	0.100589	1.4763	0.126982	6	16	[]	[]	[]	[]
'Delay of HS onset (s)'	WT 500mM'	1.04202	0.0653326	1.09832	0.0492197	7	19	Wilcoxon rank sum test	0.403358	0.835639	389
'Delay of HS onset (s)'	9Pro 500mM'	0.98685	0.112691	1.07536	0.056346	6	18	[]	[]	[]	[]
'Time-to-peak (s)'	WT 250mM'	2.2123	0.3898	2.22126	0.141966	7	17	Wilcoxon rank sum test	0.871228	-0.162099	284
'Time-to-peak (s)'	9Pro 250mM'	2.1812	0.3405	2.31352	0.160757	6	16	[]	[]	[]	[]
'Time-to-peak (s)'	WT 500mM'	1.2142	0.124	1.26824	0.0519474	7	19	Wilcoxon rank sum test	0.681643	0.410223	375
'Time-to-peak (s)'	9Pro 500mM'	1.1833	0.1024	1.26595	0.0597748	6	18	[]	[]	[]	[]
'Time-to-peak - delay (s)'	WT 250mM'	0.746231	0.190928	0.735502	0.0557428	7	17	Wilcoxon rank sum test	0.256505	-1.13469	257
'Time-to-peak - delay (s)'	9Pro 250mM'	0.866311	0.219425	0.837221	0.0624467	6	16	[]	[]	[]	[]
'Time-to-peak - delay (s)'	WT 500mM'	0.167495	0.036335	0.169918	0.0108118	7	19	Wilcoxon rank sum test	0.166787	-1.3826	315
'Time-to-peak - delay (s)'	9Pro 500mM'	0.18183	0.0420404	0.190595	0.0103981	6	18	[]	[]	[]	[]
