# Supplementary material for: Post-tetanic potentiation lowers the energy barrier for synaptic vesicle fusion independently of Synaptotagmin-1
Source: eLife. 2020 Aug 24;9:e55713. doi: 10.7554/eLife.55713 (PMC7500951; doi:10.7554/eLife.55713)
Supplement: Figure 2—source data 1. [file elife-55713-fig2-data1.xlsx]

## Sheet: Sheet1
Figure	Genotype	Median	MAD	Mean	SEM	N (weeks)	n (cells)	Primary test	pValue	zval	rank	Between groups test (when applicable)	pValue	zval	rank
Figure 2
'mEPSC frequency (Hz)'	'WT'	3.95125	2.10581	5.17445	1.21372	7	18	Wilcoxon rank sum test	0.000229826	-3.68375	233
'mEPSC frequency (Hz)'	'9Pro'	20.3051	10.0631	19.9256	2.89811	7	22
'EPSC charge (nC)'	'WT'	0.230885	0.124607	0.307292	0.0397451	5	37	Wilcoxon rank sum test	0.26468	-1.1154	1251
'EPSC charge (nC)'	'9Pro'	0.297283	0.125858	0.338902	0.0377473	5	35
'RRP (nC)'	'WT'	2.44034	0.758446	3.27769	0.548539	7	19	Wilcoxon rank sum test	0.86727	0.167128	367
'RRP (nC)'	'9Pro'	2.23485	0.96986	3.21949	0.519686	6	18
'Release_{250} / Pool_{500}'	'WT'	0.451703	0.176224	0.550035	0.0559155	7	17	Wilcoxon rank sum test	0.70526	0.37823	300
'Release_{250} / Pool_{500}'	'9Pro'	0.491364	0.101736	0.493765	0.0338955	6	16
'0mM k_{2,max} (s^{-1})'	'WT'	0.000266745	0.000109298	0.000423682	0.000109998	7	16	Wilcoxon rank sum test	0.000192801	-3.72827	168
'0mM k_{2,max} (s^{-1})'	'9Pro'	0.000955138	0.00041956	0.00146253	0.000289967	6	17
'250mM k_{2,max} (s^{-1})'	'WT'	0.164278	0.0829981	0.265709	0.0600861	7	17	Wilcoxon rank sum test	0.55227	0.594361	306
'250mM k_{2,max} (s^{-1})'	'9Pro'	0.163226	0.0369516	0.173284	0.0181214	6	16
'500mM k_{2,max} (s^{-1})'	'WT'	3.15035	0.719325	3.41807	0.299959	7	19	Wilcoxon rank sum test	0.23003	1.20028	401
'500mM k_{2,max} (s^{-1})'	'9Pro'	2.94767	0.66159	2.93345	0.217303	6	18
'0mM ΔE_a (RT)'	'WT'	0.0951166	0.416566	0	0.213439	7	16	Wilcoxon rank sum test	0.000192801
'0mM ΔE_a (RT)'	'9Pro'	-1.08747	0.578509	-1.23894	0.186007	6	17
'250mM ΔE_a (RT)'	'WT'	-6.26966	0.62321	-6.44117	0.187895	7	17	Wilcoxon rank sum test	0.55227
'250mM ΔE_a (RT)'	'9Pro'	-6.02553	0.234891	-6.0137	0.100507	6	16
'500mM ΔE_a (RT)'	'WT'	-8.97461	0.228883	-8.9956	0.080144	7	19	Wilcoxon rank sum test	0.23003
'500mM ΔE_a (RT)'	'9Pro'	-8.89031	0.248941	-8.84271	0.0700948	6	18
