# Supplementary material for: Post-tetanic potentiation lowers the energy barrier for synaptic vesicle fusion independently of Synaptotagmin-1
Source: eLife. 2020 Aug 24;9:e55713. doi: 10.7554/eLife.55713 (PMC7500951; doi:10.7554/eLife.55713)
Supplement: Figure 3—figure supplement 1—source data 1. [file elife-55713-fig3-figsupp1-data1.xlsx]

## Sheet: Sheet1
Figure	Genotype	Median	MAD	Mean	SEM	N (weeks)	n (cells)	Primary test	pValue	zval	rank	Between groups test (when applicable)	pValue	zval	rank
Figure 3 Supplement 1
'HS integral (nC)'	WT 175mM	0.538535	0.261752	0.552311	0.061211	6	25	Wilcoxon rank sum test	0.185781	-1.32316	527
'HS integral (nC)'	DN 175mM	0.640969	0.420579	0.920248	0.173835	6	21	[]	[]	[]	[]
'HS integral (nC)'	WT 250mM	2.24373	1.15795	2.48552	0.334816	6	24	Wilcoxon rank sum test	0.640936	0.466391	573
'HS integral (nC)'	DN 250mM	1.57448	8.3	2.48769	0.514603	6	21	[]	[]	[]	[]
'HS integral (nC)'	WT 350mM	4.61839	1.68604	4.6072	0.47821	6	26	Wilcoxon rank sum test	0.0557236	1.91319	746
'HS integral (nC)'	DN 350mM	2.78024	1.47242	3.5607	0.646584	6	23	[]	[]	[]	[]
'HS integral (nC)'	WT 500mM	5.41215	2.0683	5.11631	0.503308	6	29	Wilcoxon rank sum test	0.079343	1.75451	934
'HS integral (nC)'	DN 500mM	3.45522	1.44739	4.22581	0.640527	6	27	[]	[]	[]	[]
'10-90% Rise time (s)'	WT 175mM	1.6794	0.2459	1.74618	0.11749	6	25	Wilcoxon rank sum test	0.00584077	2.75659	713
'10-90% Rise time (s)'	DN 175mM	1.1903	0.1906	1.27784	0.149785	6	21	[]	[]	[]	[]
'10-90% Rise time (s)'	WT 250mM	0.68945	0.1101	0.813958	0.0844257	6	24	Wilcoxon rank sum test	0.502126	-0.671148	522
'10-90% Rise time (s)'	DN 250mM	0.7466	0.1535	0.792781	0.0468032	6	21	[]	[]	[]	[]
'10-90% Rise time (s)'	WT 350mM	0.46275	0.03705	0.506485	0.027416	6	26	Wilcoxon rank sum test	0.476969	-0.711186	614
'10-90% Rise time (s)'	DN 350mM	0.5263	0.0844	0.514961	0.0312735	6	23	[]	[]	[]	[]
'10-90% Rise time (s)'	WT 500mM	0.3056	0.0368	0.319372	0.0112868	6	29	Wilcoxon rank sum test	0.5014	0.672289	868
'10-90% Rise time (s)'	DN 500mM	0.2843	0.0645	0.336	0.0286276	6	27	[]	[]	[]	[]
'Delay of HS onset (s)'	WT 175mM	1.03656	0.297981	1.25968	0.127032	6	25	Wilcoxon rank sum test	0.377718	0.882109	628
'Delay of HS onset (s)'	DN 175mM	0.97157	0.20366	1.08899	0.131594	6	21	[]	[]	[]	[]
'Delay of HS onset (s)'	WT 250mM	1.38095	0.0768045	1.42294	0.0337601	6	24	Wilcoxon rank sum test	0.103805	1.62668	624
'Delay of HS onset (s)'	DN 250mM	1.24403	0.262884	1.34976	0.0822183	6	21	[]	[]	[]	[]
'Delay of HS onset (s)'	WT 350mM	1.17294	0.110417	1.21476	0.0419984	6	26	Wilcoxon rank sum test	0.20333	1.27212	714
'Delay of HS onset (s)'	DN 350mM	1.11613	0.0995308	1.15317	0.0714339	6	23	[]	[]	[]	[]
'Delay of HS onset (s)'	WT 500mM	1.12655	0.0973869	1.20029	0.0555897	6	29	Wilcoxon rank sum test	0.231305	1.197	900
'Delay of HS onset (s)'	DN 500mM	1.05005	0.204854	1.23434	0.112876	6	27	[]	[]	[]	[]
'Time-to-peak (s)'	WT 175mM	3.7867	0.4359	4.03472	0.213494	6	25	Wilcoxon rank sum test	0.000581234	3.44022	744
'Time-to-peak (s)'	DN 175mM	2.706	0.5886	2.89964	0.316398	6	21	[]	[]	[]	[]
'Time-to-peak (s)'	WT 250mM	2.2834	0.25865	2.44158	0.114239	6	24	Wilcoxon rank sum test	0.161761	1.39917	614
'Time-to-peak (s)'	DN 250mM	2.2044	0.3514	2.23618	0.0886335	6	21	[]	[]	[]	[]
'Time-to-peak (s)'	WT 350mM	1.5793	0.09575	1.66512	0.0563163	6	26	Wilcoxon rank sum test	0.163825	1.39232	720
'Time-to-peak (s)'	DN 350mM	1.5439	0.2223	1.55063	0.0827672	6	23	[]	[]	[]	[]
'Time-to-peak (s)'	WT 500mM	1.3408	0.0999	1.42446	0.0567293	6	29	Wilcoxon rank sum test	0.173521	1.36098	910
'Time-to-peak (s)'	DN 500mM	1.2452	0.2073	1.43945	0.117979	6	27	[]	[]	[]	[]
'Time-to-peak - delay (s)'	WT 175mM	2.546	0.511958	2.77504	0.205639	6	25	Wilcoxon rank sum test	0.00101674	3.28585	737
'Time-to-peak - delay (s)'	DN 175mM	1.69591	0.25894	1.81065	0.198979	6	21	[]	[]	[]	[]
'Time-to-peak - delay (s)'	WT 250mM	0.885215	0.161619	1.01864	0.102104	6	24	Wilcoxon rank sum test	0.432511	0.784902	587
'Time-to-peak - delay (s)'	DN 250mM	0.876656	0.218811	0.886412	0.0594042	6	21	[]	[]	[]	[]
'Time-to-peak - delay (s)'	WT 350mM	0.440997	0.0479095	0.450353	0.0265342	6	26	Wilcoxon rank sum test	0.176294	1.35226	718
'Time-to-peak - delay (s)'	DN 350mM	0.394062	0.0949907	0.397463	0.0226172	6	23	[]	[]	[]	[]
'Time-to-peak - delay (s)'	WT 500mM	0.220427	0.0284459	0.224172	0.00749932	6	29	Wilcoxon rank sum test	0.0662841	1.8365	939
'Time-to-peak - delay (s)'	DN 500mM	0.196165	0.0319857	0.205111	0.00997932	6	27	[]	[]	[]	[]
