# Supplementary material for: Post-tetanic potentiation lowers the energy barrier for synaptic vesicle fusion independently of Synaptotagmin-1
Source: eLife. 2020 Aug 24;9:e55713. doi: 10.7554/eLife.55713 (PMC7500951; doi:10.7554/eLife.55713)
Supplement: Figure 3—figure supplement 2—source data 1. [file elife-55713-fig3-figsupp2-data1.xlsx]

## Sheet: Sheet1
Figure	Genotype	Median	MAD	Mean	SEM	N (weeks)	n (cells)	Primary test	pValue	zval	rank	Between groups test (when applicable)	pValue	zval	rank
Figure 3 Supplement 2
'mEPSC frequency (Hz)'	'WT'	9.48418	6.95231	13.9788	3.1517	9	18	Wilcoxon rank sum test	1.70197e-06	-4.78593	184
'mEPSC frequency (Hz)'	'4W'	74.5667	38.0333	90.0939	11.3872	8	19
'EPSC charge (pC)'	'WT'	91.3863	50.9666	179.189	55.8874	8	16	Wilcoxon rank sum test	0.777432	-0.282667	256
'EPSC charge (pC)'	'4W'	154.72	103.782	161.258	34.5727	7	16
'Release probability'	'WT'	0.0926174	0.0485788	0.11264	0.0238818	8	15	Wilcoxon rank sum test	0.0380883	-2.0739	182
'Release probability'	'4W'	0.153849	0.0521148	0.16834	0.0239812	7	15
'RRP (nC)'	'WT'	1.14631	0.490238	1.73913	0.308037	8	39	Wilcoxon rank sum test	0.103385	1.62866	1817
'RRP (nC)'	'4W'	0.93687	0.448822	1.13341	0.137202	10	44
'Release_{250} / Pool_{500}'	'WT'	0.490379	0.182734	0.484311	0.0361306	8	36	Wilcoxon rank sum test	0.0307747	-2.15997	1206
'Release_{250} / Pool_{500}'	'4W'	0.573216	0.0812491	0.596186	0.0240752	10	42
'0mM k_{2,max} (s^{-1})'	'WT'	0.000994983	0.000580348	0.00169884	0.000571235	8	16	Wilcoxon rank sum test	6.16211e-06	-4.52075	146
'0mM k_{2,max} (s^{-1})'	'4W'	0.0132023	0.00568181	0.0118725	0.00166293	8	17
'250mM k_{2,max} (s^{-1})'	'WT'	0.155706	0.0830004	0.199939	0.0255864	8	36	Wilcoxon rank sum test	0.0375449	-2.07979	1214
'250mM k_{2,max} (s^{-1})'	'4W'	0.215598	0.0487291	0.330564	0.0666801	10	42
'375mM k_{2,max} (s^{-1})'	'WT'	0.822506	0.20214	1.07724	0.117818	6	17	Wilcoxon rank sum test	0.900084	0.125555	267
'375mM k_{2,max} (s^{-1})'	'4W'	1.03954	0.427071	1.34446	0.365929	6	13
'500mM k_{2,max} (s^{-1})'	'WT'	2.50993	0.540654	2.50224	0.125146	8	39	Wilcoxon rank sum test	0.233771	1.1907	1769
'500mM k_{2,max} (s^{-1})'	'4W'	2.29454	0.345469	2.31951	0.109889	10	44
'750mM k_{2,max} (s^{-1})'	'WT'	4.22546	1.32879	4.77442	0.524228	6	18	Wilcoxon rank sum test	0.0977049	1.65608	397
'750mM k_{2,max} (s^{-1})'	'4W'	3.16086	0.84205	4.10617	0.668062	6	19
'0mM ΔE_a (RT)'	'WT'	0.0759504	0.612122	0	0.236633	8	16	Wilcoxon rank sum test	6.16211e-06
'0mM ΔE_a (RT)'	'4W'	-2.25234	0.389919	-1.94428	0.171754	8	17
'250mM ΔE_a (RT)'	'WT'	-4.82111	0.55087	-4.76807	0.144642	8	36	Wilcoxon rank sum test	0.0375449
'250mM ΔE_a (RT)'	'4W'	-5.17099	0.232864	-5.27086	0.10717	10	42
'375mM ΔE_a (RT)'	'WT'	-6.26822	0.235129	-6.45221	0.100908	6	17	Wilcoxon rank sum test	0.900084
'375mM ΔE_a (RT)'	'4W'	-6.68405	0.344176	-6.6738	0.193422	6	13
'500mM ΔE_a (RT)'	'WT'	-7.3484	0.225648	-7.295	0.0528838	8	39	Wilcoxon rank sum test	0.233771
'500mM ΔE_a (RT)'	'4W'	-7.25657	0.158231	-7.21917	0.0485067	10	44
'750mM ΔE_a (RT)'	'WT'	-7.92703	0.315703	-7.94108	0.119883	6	18	Wilcoxon rank sum test	0.0977049
'750mM ΔE_a (RT)'	'4W'	-7.68421	0.294461	-7.7903	0.119708	6	19
