# Supplementary material for: Post-tetanic potentiation lowers the energy barrier for synaptic vesicle fusion independently of Synaptotagmin-1
Source: eLife. 2020 Aug 24;9:e55713. doi: 10.7554/eLife.55713 (PMC7500951; doi:10.7554/eLife.55713)
Supplement: Figure 3—figure supplement 3—source data 1. [file elife-55713-fig3-figsupp3-data1.xlsx]

## Sheet: Sheet1
Figure	Genotype	Median	MAD	Mean	SEM	N (weeks)	n (cells)	Primary test	pValue	zval	rank	Between groups test (when applicable)	pValue	zval	rank
Figure 3 Supplement 3
'HS integral (nC)'	WT 250mM	0.593856	0.298643	1.15137	0.345449	8	36	Wilcoxon rank sum test	0.366244	-0.903532	1315
'HS integral (nC)'	4W 250mM	0.770731	0.242707	0.861725	0.0921617	10	41	[]	[]	[]	[]
'HS integral (nC)'	WT 375mM	1.44496	0.835278	2.60033	0.790073	6	17	Wilcoxon rank sum test	0.209278	1.25555	294
'HS integral (nC)'	4W 375mM	1.0432	0.302187	1.16432	0.210514	6	13	[]	[]	[]	[]
'HS integral (nC)'	WT 500mM	1.55063	0.617195	2.32808	0.410984	8	39	Wilcoxon rank sum test	0.161347	1.40056	1792
'HS integral (nC)'	4W 500mM	1.29741	0.616972	1.55099	0.18347	10	44	[]	[]	[]	[]
'HS integral (nC)'	WT 750mM	1.36745	0.447008	2.18279	0.415695	6	18	Wilcoxon rank sum test	0.475171	-0.714091	318
'HS integral (nC)'	4W 750mM	1.81869	0.798089	2.41325	0.397059	6	19	[]	[]	[]	[]
'10-90% Rise time (s)'	WT 250mM	0.7535	0.1196	0.855222	0.0449891	8	36	Wilcoxon rank sum test	0.263588	1.11795	1514
'10-90% Rise time (s)'	4W 250mM	0.7423	0.1637	0.820939	0.0543985	10	41	[]	[]	[]	[]
'10-90% Rise time (s)'	WT 375mM	0.4604	0.0906	0.529806	0.0380635	6	17	Wilcoxon rank sum test	0.315166	-1.00444	239
'10-90% Rise time (s)'	4W 375mM	0.5064	0.0816	0.5953	0.0663555	6	13	[]	[]	[]	[]
'10-90% Rise time (s)'	WT 500mM	0.3599	0.055	0.393482	0.0163376	8	39	Wilcoxon rank sum test	0.011793	-2.51828	1361.5
'10-90% Rise time (s)'	4W 500mM	0.43355	0.082	0.45718	0.0209453	10	44	[]	[]	[]	[]
'10-90% Rise time (s)'	WT 750mM	0.31005	0.05805	0.32305	0.028242	6	18	Wilcoxon rank sum test	0.0946474	-1.67138	286.5
'10-90% Rise time (s)'	4W 750mM	0.347	0.0484	0.362142	0.0172965	6	19	[]	[]	[]	[]
'Delay of HS onset (s)'	WT 250mM	1.68373	0.335281	1.72912	0.0714421	8	36	Wilcoxon rank sum test	0.0075906	2.66976	1666
'Delay of HS onset (s)'	4W 250mM	1.41695	0.237142	1.49538	0.0933514	10	41	[]	[]	[]	[]
'Delay of HS onset (s)'	WT 375mM	1.40698	0.390294	1.52548	0.095763	6	17	Wilcoxon rank sum test	0.194492	1.2974	295
'Delay of HS onset (s)'	4W 375mM	1.30961	0.184185	1.45326	0.187061	6	13	[]	[]	[]	[]
'Delay of HS onset (s)'	WT 500mM	1.53651	0.259383	1.68486	0.0830318	8	39	Wilcoxon rank sum test	0.0132415	2.47721	1910
'Delay of HS onset (s)'	4W 500mM	1.39023	0.20976	1.41309	0.0538303	10	44	[]	[]	[]	[]
'Delay of HS onset (s)'	WT 750mM	1.34828	0.18516	1.41776	0.111413	6	18	Wilcoxon rank sum test	0.420674	0.805252	369
'Delay of HS onset (s)'	4W 750mM	1.27791	0.196384	1.28541	0.0838856	6	19	[]	[]	[]	[]
'Fitted RRP (nC)'	WT 500mM	1.14631	0.490238	1.73913	0.308037	8	39	Wilcoxon rank sum test	0.103385	1.62866	1817
'Fitted RRP (nC)'	4W 500mM	0.93687	0.448822	1.13341	0.137202	10	44	[]	[]	[]	[]
'Fitted RRP (nC)'	WT 750mM	1.08349	0.498736	1.58686	0.329152	6	18	Wilcoxon rank sum test	0.553487	-0.592544	322
'Fitted RRP (nC)'	4W 750mM	1.2066	0.375341	1.56201	0.243657	6	19	[]	[]	[]	[]
'Time-to-peak (s)'	WT 250mM	2.66085	0.43765	2.82519	0.105642	8	36	Wilcoxon rank sum test	0.00223032	3.05771	1704
'Time-to-peak (s)'	4W 250mM	2.3095	0.3953	2.40853	0.116561	10	41	[]	[]	[]	[]
'Time-to-peak (s)'	WT 375mM	1.8838	0.3012	1.95688	0.108765	6	17	Wilcoxon rank sum test	0.503095	0.669628	280
'Time-to-peak (s)'	4W 375mM	1.6994	0.2336	1.80766	0.112173	6	13	[]	[]	[]	[]
'Time-to-peak (s)'	WT 500mM	1.7737	0.2981	1.91698	0.0836424	8	39	Wilcoxon rank sum test	0.030236	2.16699	1876
'Time-to-peak (s)'	4W 500mM	1.6251	0.2386	1.66813	0.0573801	10	44	[]	[]	[]	[]
'Time-to-peak (s)'	WT 750mM	1.4895	0.1883	1.55467	0.124589	6	18	Wilcoxon rank sum test	0.726752	0.349449	354
'Time-to-peak (s)'	4W 750mM	1.452	0.2322	1.44767	0.0922261	6	19	[]	[]	[]	[]
'Time-to-peak - delay (s)'	WT 250mM	0.94652	0.263332	1.09607	0.0655359	8	36	Wilcoxon rank sum test	0.0285303	2.18992	1619
'Time-to-peak - delay (s)'	4W 250mM	0.840924	0.141426	0.913152	0.0697514	10	41	[]	[]	[]	[]
'Time-to-peak - delay (s)'	WT 375mM	0.403763	0.0663979	0.431403	0.0244356	6	17	Wilcoxon rank sum test	0.834246	-0.209259	258
'Time-to-peak - delay (s)'	4W 375mM	0.424395	0.0570661	0.354397	0.0969833	6	13	[]	[]	[]	[]
'Time-to-peak - delay (s)'	WT 500mM	0.222385	0.0395834	0.232124	0.0111384	8	39	Wilcoxon rank sum test	0.101467	-1.63778	1458
'Time-to-peak - delay (s)'	4W 500mM	0.258772	0.0417361	0.255042	0.00960205	10	44	[]	[]	[]	[]
'Time-to-peak - delay (s)'	WT 750mM	0.124959	0.0474431	0.136907	0.0236875	6	18	Wilcoxon rank sum test	0.132543	-1.50415	292
'Time-to-peak - delay (s)'	4W 750mM	0.17217	0.0459442	0.162263	0.0213683	6	19	[]	[]	[]	[]
