# Supplementary material for: Post-tetanic potentiation lowers the energy barrier for synaptic vesicle fusion independently of Synaptotagmin-1
Source: eLife. 2020 Aug 24;9:e55713. doi: 10.7554/eLife.55713 (PMC7500951; doi:10.7554/eLife.55713)
Supplement: Figure 3—source data 1. [file elife-55713-fig3-data1.xlsx]

## Sheet: Sheet1
Figure	Genotype	Median	MAD	Mean	SEM	N (weeks)	n (cells)	Primary test	pValue	zval	rank	Between groups test (when applicable)	pValue	zval	rank
Figure 3
'mEPSC frequency (Hz)'	'WT'	8.29991	6.41786	12.5693	1.8378	6	31	Wilcoxon rank sum test	0.000195763	-3.72442	785
'mEPSC frequency (Hz)'	'DN'	27.5726	16.1751	34.0501	4.47645	7	39
'EPSC charge (nC)'	'WT'	0.10594	0.0551395	0.132816	0.0191051	6	34	Wilcoxon rank sum test	0.0426595	-2.02703	1034
'EPSC charge (nC)'	'DN'	0.152352	0.101093	0.275086	0.0520709	7	36
'RRP (nC)'	'WT'	3.54955	1.43315	3.32824	0.332398	6	29	Wilcoxon rank sum test	0.119294	1.55774	922
'RRP (nC)'	'DN'	1.87468	1.09071	2.73934	0.409138	6	27
'Release_{250} / Pool_{500}'	'WT'	0.498081	0.110892	0.491175	0.0266572	6	24	Wilcoxon rank sum test	0.0061165	-2.74147	431
'Release_{250} / Pool_{500}'	'DN'	0.616474	0.115137	0.621699	0.0339788	6	21
'0mM k_{2,max} (s^{-1})'	'WT'	0.000518542	0.000357353	0.00108159	0.000237533	6	28	Wilcoxon rank sum test	0.000495264	-3.4833	560
'0mM k_{2,max} (s^{-1})'	'DN'	0.00247203	0.00142353	0.00340251	0.00111763	6	25
'175mM k_{2,max} (s^{-1})'	'WT'	0.0352735	0.0127536	0.0350882	0.00354479	6	25	Wilcoxon rank sum test	0.000162586	-3.77101	416
'175mM k_{2,max} (s^{-1})'	'DN'	0.0629037	0.0185774	0.0667887	0.00742396	6	21
'250mM k_{2,max} (s^{-1})'	'WT'	0.201021	0.0656464	0.203752	0.0173223	6	24	Wilcoxon rank sum test	0.0144567	-2.44571	444
'250mM k_{2,max} (s^{-1})'	'DN'	0.290337	0.110806	0.349994	0.0513656	6	21
350mM k_{2,max} (s^{-1})'	'WT'	0.874377	0.246132	0.975017	0.0971103	6	26	Wilcoxon rank sum test	0.0610512	-1.87312	556
350mM k_{2,max} (s^{-1})'	'DN'	1.28253	0.324248	1.21829	0.109195	6	23
'500mM k_{2,max} (s^{-1})'	'WT'	2.25525	0.414487	2.38897	0.105164	6	29	Wilcoxon rank sum test	0.108069	-1.60694	728
'500mM k_{2,max} (s^{-1})'	'DN'	2.7242	0.373742	2.64618	0.106454	6	27
'0mM ΔE_a (RT)'	'WT'	0.099854	0.849999	0	0.230291	6	28	Wilcoxon rank sum test	0.000495264
'0mM ΔE_a (RT)'	'DN'	-1.39066	0.60056	-1.14608	0.199204	6	25
'175mM ΔE_a (RT)'	'WT'	-3.63552	0.374729	-3.47943	0.122054	6	25	Wilcoxon rank sum test	0.000162586
'175mM ΔE_a (RT)'	'DN'	-4.21849	0.281252	-4.1231	0.144439	6	21
'250mM ΔE_a (RT)'	'WT'	-5.31828	0.339624	-5.23847	0.0937428	6	24	Wilcoxon rank sum test	0.0144567
'250mM ΔE_a (RT)'	'DN'	-5.76585	0.44219	-5.77948	0.12813	6	21
350mM ΔE_a (RT)'	'WT'	-6.8144	0.25736	-6.80402	0.0996343	6	26	Wilcoxon rank sum test	0.0610512
350mM ΔE_a (RT)'	'DN'	-7.18452	0.233688	-7.02677	0.103805	6	23
'500mM ΔE_a (RT)'	'WT'	-7.66925	0.19481	-7.70018	0.0435217	6	29	Wilcoxon rank sum test	0.108069
'500mM ΔE_a (RT)'	'DN'	-7.85392	0.128563	-7.80244	0.042375	6	27
