# Supplementary material for: Post-tetanic potentiation lowers the energy barrier for synaptic vesicle fusion independently of Synaptotagmin-1
Source: eLife. 2020 Aug 24;9:e55713. doi: 10.7554/eLife.55713 (PMC7500951; doi:10.7554/eLife.55713)
Supplement: Figure 4—figure supplement 1—source data 1. [file elife-55713-fig4-figsupp1-data1.xlsx]

## Sheet: Sheet1
Figure	Genotype	Median	MAD	Mean	SEM	N (weeks)	n (cells)	Primary test	pValue	zval	rank	Between groups test (when applicable)	pValue	zval	rank
Figure 4 Supplement 1
'HS integral (nC)'	WT Naive 250mM	0.453698	0.252804	0.641538	0.0948878	5	24	Wilcoxon signed rank test	0.153127	-1.42857	100
'HS integral (nC)'	WT PTP 250mM	0.564884	0.263151	0.719496	0.104117	5	24		[]	[]	[]
'HS integral (nC)'	WT Naive 500mM	1.41903	0.628757	1.71993	0.247273	5	25	Wilcoxon signed rank test	7.22447e-05	3.96877	310
'HS integral (nC)'	WT PTP 500mM	1.25617	0.595017	1.44729	0.216518	5	25		[]	[]	[]
'10-90% Rise time (s)'	WT Naive 250mM	0.97155	0.26875	1.25269	0.172965	5	24	Wilcoxon signed rank test	0.000335921	3.5859	275.5
'10-90% Rise time (s)'	WT PTP 250mM	0.6909	0.1096	0.810529	0.0695169	5	24		[]	[]	[]
'10-90% Rise time (s)'	WT Naive 500mM	0.3474	0.0566	0.371512	0.023509	5	25	Wilcoxon signed rank test	0.0479673	1.97766	236
'10-90% Rise time (s)'	WT PTP 500mM	0.3587	0.0528	0.352988	0.018064	5	25		[]	[]	[]
'Delay of HS onset (s)'	WT Naive 250mM	1.98976	0.486214	2.24736	0.201788	5	24	Wilcoxon signed rank test	1.82153e-05	4.28571	300
'Delay of HS onset (s)'	WT PTP 250mM	1.27878	0.210353	1.41488	0.0770693	5	24		[]	[]	[]
'Delay of HS onset (s)'	WT Naive 500mM	1.20001	0.256493	1.30759	0.107406	5	25	Wilcoxon signed rank test	0.000363626	3.56517	295
'Delay of HS onset (s)'	WT PTP 500mM	1.14754	0.25582	1.17575	0.0801483	5	25		[]	[]	[]
'Time-to-peak (s)'	WT Naive 250mM	3.43725	0.67115	3.55643	0.240482	5	24	Wilcoxon signed rank test	2.66915e-05	4.2	297
'Time-to-peak (s)'	WT PTP 250mM	2.2062	0.2265	2.36494	0.114981	5	24		[]	[]	[]
'Time-to-peak (s)'	WT Naive 500mM	1.4461	0.3189	1.54578	0.114732	5	25	Wilcoxon signed rank test	4.57389e-05	4.0764	314
'Time-to-peak (s)'	WT PTP 500mM	1.3766	0.213	1.39063	0.087367	5	25		[]	[]	[]
'Time-to-peak - delay (s)'	WT Naive 250mM	1.15299	0.282019	1.30908	0.111763	5	24	Wilcoxon signed rank test	0.00101724	3.28571	265
'Time-to-peak - delay (s)'	WT PTP 250mM	0.826035	0.138006	0.95006	0.0628394	5	24		[]	[]	[]
'Time-to-peak - delay (s)'	WT Naive 500mM	0.237015	0.0344346	0.238193	0.0118948	5	25	Wilcoxon signed rank test	0.000980383	3.2961	285
'Time-to-peak - delay (s)'	WT PTP 500mM	0.197863	0.0317942	0.21488	0.0104337	5	25		[]	[]	[]
