# Supplementary material for: Post-tetanic potentiation lowers the energy barrier for synaptic vesicle fusion independently of Synaptotagmin-1
Source: eLife. 2020 Aug 24;9:e55713. doi: 10.7554/eLife.55713 (PMC7500951; doi:10.7554/eLife.55713)
Supplement: Figure 4—source data 1. [file elife-55713-fig4-data1.xlsx]

## Sheet: Sheet1
Figure	Genotype	Median	MAD	Mean	SEM	N (weeks)	n (cells)	Primary test	pValue	zval	rank	Between groups test (when applicable)	pValue	zval	rank
Figure 4
'EPSC charge (pC)'	WT Naive'	10.0769	5.85323	10.2198	1.32997	5	30	Wilcoxon signed rank test	0.0195692	-2.33451	119
'EPSC charge (pC)'	WT PTP'	14.0105	8.23591	13.5129	1.77027	5	30
'Release probability'	WT Naive'	0.00738635	0.00342626	0.00796544	0.00133871	5	24	Wilcoxon signed rank test	0.000395817	-3.54286	26
'Release probability'	WT PTP'	0.0104047	0.00580731	0.0142198	0.00237081	5	24
'RRP (nC)'	WT Naive'	1.05849	0.446447	1.20572	0.156672	5	25	Wilcoxon signed rank test	1.3898e-05	4.34547	324
'RRP (nC)'	WT PTP'	0.875421	0.377181	0.939522	0.124945	5	25
'Release_{250} / Pool_{500}'	WT Naive'	0.42893	0.0967689	0.409823	0.0264698	5	24	Wilcoxon signed rank test	0.000355039	-3.57143	25
'Release_{250} / Pool_{500}'	WT PTP'	0.523009	0.114179	0.538324	0.0340301	5	24
'0mM k_{2,max} (s^{-1})'	WT Naive'	0.0024	0.00035	0.00246129	8.34314e-05	5	31
'250mM k_{2,max} (s^{-1})'	WT Naive'	0.17306	0.0464808	0.171735	0.0208581	5	24	Wilcoxon signed rank test	0.00296418	-2.97143	46
'250mM k_{2,max} (s^{-1})'	WT PTP'	0.220072	0.0912411	0.234651	0.0254385	5	24
'500mM k_{2,max} (s^{-1})'	WT Naive'	2.23012	0.292656	2.31065	0.106828	5	25	Wilcoxon signed rank test	0.00416238	-2.86559	56
'500mM k_{2,max} (s^{-1})'	WT PTP'	2.67886	0.64177	2.70349	0.12737	5	25
'0mM ΔE_a (RT)'	WT Naive'	0.00793944	0.136132	0	0.0340057	5	31
'250mM ΔE_a (RT)'	WT Naive'	-4.40773	0.286167	-4.24527	0.119584	5	24	Wilcoxon signed rank test	0.00296418
'250mM ΔE_a (RT)'	WT PTP'	-4.6394	0.444224	-4.55741	0.121368	5	24
'500mM ΔE_a (RT)'	WT Naive'	-6.833	0.133713	-6.8446	0.0439714	5	25	Wilcoxon signed rank test	0.00416238
'500mM ΔE_a (RT)'	WT PTP'	-7.02048	0.244113	-7.00161	0.04898	5	25
