# Supplementary material for: Post-tetanic potentiation lowers the energy barrier for synaptic vesicle fusion independently of Synaptotagmin-1
Source: eLife. 2020 Aug 24;9:e55713. doi: 10.7554/eLife.55713 (PMC7500951; doi:10.7554/eLife.55713)
Supplement: Figure 5—figure supplement 1—source data 1. [file elife-55713-fig5-figsupp1-data1.xlsx]

## Sheet: Sheet1
Figure	Genotype	Median	MAD	Mean	SEM	N (weeks)	n (cells)	Primary test	pValue	zval	rank	Between groups test (when applicable)	pValue	zval	rank
Figure 5 Supplement 1
'HS integral (nC)'	KO Naive 250mM	1.19204	0.433767	1.44908	0.17914	4	25	Wilcoxon signed rank test	0.109386	-1.60096	103
'HS integral (nC)'	KO PTP 250mM	1.6618	0.544537	1.66889	0.193073	4	25		[]	[]	[]
'HS integral (nC)'	KO Naive 500mM	3.38108	1.30778	3.28916	0.364498	4	26	Wilcoxon signed rank test	0.000119186	3.84779	327
'HS integral (nC)'	KO PTP 500mM	2.34539	0.802479	2.50922	0.324351	4	26		[]	[]	[]
'10-90% Rise time (s)'	KO Naive 250mM	0.74065	0.2047	0.840031	0.072715	4	26	Wilcoxon signed rank test	0.000242543	3.67001	320
'10-90% Rise time (s)'	KO PTP 250mM	0.5372	0.11285	0.586346	0.060056	4	26		[]	[]	[]
'10-90% Rise time (s)'	KO Naive 500mM	0.3607	0.05465	0.430335	0.0342215	4	26	Wilcoxon signed rank test	0.360526	-0.914364	139.5
'10-90% Rise time (s)'	KO PTP 500mM	0.3745	0.05275	0.438154	0.0321551	4	26		[]	[]	[]
'Delay of HS onset (s)'	KO Naive 250mM	0.96836	0.205213	0.975923	0.0494816	4	25	Wilcoxon signed rank test	1.22903e-05	4.37237	325
'Delay of HS onset (s)'	KO PTP 250mM	0.546646	0.0938645	0.566864	0.0235443	4	25		[]	[]	[]
'Delay of HS onset (s)'	KO Naive 500mM	0.967066	0.104754	1.07326	0.0531061	4	26	Wilcoxon signed rank test	1.18054e-05	4.38115	348
'Delay of HS onset (s)'	KO PTP 500mM	0.785934	0.0940954	0.864678	0.0365067	4	26		[]	[]	[]
'Time-to-peak (s)'	KO Naive 250mM	2.0083	0.47155	1.98252	0.120133	4	26	Wilcoxon signed rank test	0.000146459	3.797	325
'Time-to-peak (s)'	KO PTP 250mM	1.2292	0.19675	1.39665	0.230389	4	26		[]	[]	[]
'Time-to-peak (s)'	KO Naive 500mM	1.25815	0.1686	1.38027	0.0681033	4	26	Wilcoxon signed rank test	8.2981e-06	4.45735	351
'Time-to-peak (s)'	KO PTP 500mM	1.0309	0.09865	1.12117	0.0481103	4	26		[]	[]	[]
'Time-to-peak - delay (s)'	KO Naive 250mM	0.956772	0.292912	1.02389	0.0800085	4	25	Wilcoxon signed rank test	1.57051e-05	4.31856	323
'Time-to-peak - delay (s)'	KO PTP 250mM	0.592248	0.0897214	0.605644	0.0363131	4	25		[]	[]	[]
'Time-to-peak - delay (s)'	KO Naive 500mM	0.271498	0.0552417	0.307008	0.0286198	4	26	Wilcoxon signed rank test	0.00427299	2.85727	288
'Time-to-peak - delay (s)'	KO PTP 500mM	0.224589	0.0434093	0.256491	0.0269269	4	26		[]	[]	[]
