# Supplementary material for: Post-tetanic potentiation lowers the energy barrier for synaptic vesicle fusion independently of Synaptotagmin-1
Source: eLife. 2020 Aug 24;9:e55713. doi: 10.7554/eLife.55713 (PMC7500951; doi:10.7554/eLife.55713)
Supplement: Figure 5—source data 1. [file elife-55713-fig5-data1.xlsx]

## Sheet: Sheet1
Figure	Genotype	Median	MAD	Mean	SEM	N (weeks)	n (cells)	Primary test	pValue	zval	rank	Between groups test (when applicable)	pValue	zval	rank
Figure 5
'EPSC charge (pC)'	Syt1 KO Naive'	25.4332	18.0303	41.7152	8.02472	4	30	Wilcoxon signed rank test	0.00316176	-2.95156	89
'EPSC charge (pC)'	Syt1 KO PTP'	45.9809	28.8768	52.9074	8.2709	4	30
'Release probability'	Syt1 KO Naive'	0.0193531	0.00839783	0.0222785	0.00259419	4	26	Wilcoxon signed rank test	8.2981e-06	-4.45735	0
'Release probability'	Syt1 KO PTP'	0.0374739	0.00936817	0.0403219	0.00325549	4	26
'RRP (nC)'	Syt1 KO Naive'	2.04877	0.741771	1.90388	0.208868	4	26	Wilcoxon signed rank test	0.00120269	3.23824	303
'RRP (nC)'	Syt1 KO PTP'	1.45384	0.51161	1.47918	0.169918	4	26
'Release_{250} / Pool_{500}'	Syt1 KO Naive'	0.457022	0.138637	0.485424	0.0304104	4	25	Wilcoxon signed rank test	1.77348e-05	-4.29165	3
'Release_{250} / Pool_{500}'	Syt1 KO PTP'	0.75347	0.0930247	0.711189	0.0240434	4	25
'0mM k_{2,max} (s^{-1})'	Syt1 KO Naive'	0.002	0.0002	0.00211765	6.97871e-05	4	17
'250mM k_{2,max} (s^{-1})'	Syt1 KO Naive'	0.223264	0.0997022	0.23349	0.0233575	4	25	Wilcoxon signed rank test	1.57051e-05	-4.31856	2
'250mM k_{2,max} (s^{-1})'	Syt1 KO PTP'	0.395048	0.116484	0.440544	0.0392522	4	25
'500mM k_{2,max} (s^{-1})'	Syt1 KO Naive'	1.94101	0.421129	1.98835	0.131062	4	26	Wilcoxon signed rank test	0.00363669	-2.90807	61
'500mM k_{2,max} (s^{-1})'	Syt1 KO PTP'	2.40944	0.699055	2.57444	0.233218	4	26
'0mM ΔE_a (RT)'	Syt1 KO Naive'	0.049138	0.0953102	0	0.0310813	4	17
'250mM ΔE_a (RT)'	Syt1 KO Naive'	-4.7933	0.385399	-4.70283	0.110414	4	25	Wilcoxon signed rank test	1.57051e-05
'250mM ΔE_a (RT)'	Syt1 KO PTP'	-5.31638	0.284419	-5.33771	0.0849052	4	25
'500mM ΔE_a (RT)'	Syt1 KO Naive'	-6.88998	0.228175	-6.84476	0.0806264	4	26	Wilcoxon signed rank test	0.00363669
'500mM ΔE_a (RT)'	Syt1 KO PTP'	-7.13424	0.296975	-7.10308	0.0892022	4	26
