# Supplementary material for: Post-tetanic potentiation lowers the energy barrier for synaptic vesicle fusion independently of Synaptotagmin-1
Source: eLife. 2020 Aug 24;9:e55713. doi: 10.7554/eLife.55713 (PMC7500951; doi:10.7554/eLife.55713)
Supplement: Figure 6—figure supplement 1—source data 1. [file elife-55713-fig6-figsupp1-data1.xlsx]

## Sheet: Sheet1
Figure	Genotype	Median	MAD	Mean	SEM	N (weeks)	n (cells)	Primary test	pValue	zval	rank	Between groups test (when applicable)	pValue	zval	rank
Figure 6 Supplement 1
'HS integral (nC)'	WT -PDBu' 250mM	0.98015	0.345234	1.17041	0.283664	3	14	Wilcoxon signed rank test	0.00012207	[]	0
'HS integral (nC)'	WT +PDBu' 250mM	1.34592	0.549736	1.64215	0.349143	3	14		[]	[]	[]
'HS integral (nC)'	WT -PDBu' 500mM	1.67669	0.936986	2.13313	0.488967	3	14	Wilcoxon signed rank test	0.0012207	[]	5
'HS integral (nC)'	WT +PDBu' 500mM	1.92045	0.696274	2.40882	0.496598	3	14		[]	[]	[]
'HS integral (nC)'	KO -PDBu' 250mM	0.578918	0.215989	0.614124	0.082928	3	12	Wilcoxon signed rank test	0.000976562	[]	1
'HS integral (nC)'	KO +PDBu' 250mM	0.887488	0.317366	0.930429	0.155727	3	12		[]	[]	[]
'HS integral (nC)'	KO -PDBu' 500mM	1.66348	0.560757	1.43205	0.217959	3	12	Wilcoxon signed rank test	1	[]	39
'HS integral (nC)'	KO +PDBu' 500mM	1.28596	0.627536	1.42686	0.270716	3	12		[]	[]	[]
'10-90% Rise time (s)'	WT -PDBu' 250mM	0.75255	0.19805	0.804057	0.0712734	3	14	Wilcoxon signed rank test	0.193726	[]	74
'10-90% Rise time (s)'	WT +PDBu' 250mM	0.7017	0.08955	0.717564	0.0392803	3	14		[]	[]	[]
'10-90% Rise time (s)'	WT -PDBu' 500mM	0.2767	0.0267	0.306279	0.0196687	3	14	Wilcoxon signed rank test	0.00854492	[]	12
'10-90% Rise time (s)'	WT +PDBu' 500mM	0.2904	0.0232	0.332207	0.0216767	3	14		[]	[]	[]
'10-90% Rise time (s)'	KO -PDBu' 250mM	0.84315	0.0441	0.914183	0.0825454	3	12	Wilcoxon signed rank test	0.000488281	[]	78
'10-90% Rise time (s)'	KO +PDBu' 250mM	0.64675	0.07165	0.640617	0.0330799	3	12		[]	[]	[]
'10-90% Rise time (s)'	KO -PDBu' 500mM	0.39555	0.0531	0.40505	0.0327304	3	12	Wilcoxon signed rank test	0.0341797	[]	12
'10-90% Rise time (s)'	KO +PDBu' 500mM	0.4304	0.048	0.441342	0.0193299	3	12		[]	[]	[]
'Delay of HS onset (s)'	WT -PDBu' 250mM	1.27289	0.120962	1.30347	0.0552137	3	14	Wilcoxon signed rank test	0.0166016	[]	90
'Delay of HS onset (s)'	WT +PDBu' 250mM	1.07979	0.174688	1.11732	0.0734546	3	14		[]	[]	[]
'Delay of HS onset (s)'	WT -PDBu' 500mM	1.18856	0.156477	1.18026	0.0400524	3	14	Wilcoxon signed rank test	0.118896	[]	78
'Delay of HS onset (s)'	WT +PDBu' 500mM	0.994287	0.165766	1.06514	0.0697698	3	14		[]	[]	[]
'Delay of HS onset (s)'	KO -PDBu' 250mM	1.0528	0.0686899	1.06986	0.0304985	3	12	Wilcoxon signed rank test	0.000976562	[]	77
'Delay of HS onset (s)'	KO +PDBu' 250mM	0.665812	0.0734009	0.704627	0.0549215	3	12		[]	[]	[]
'Delay of HS onset (s)'	KO -PDBu' 500mM	1.13256	0.133848	1.20078	0.0653671	3	12	Wilcoxon signed rank test	0.00927734	[]	71
'Delay of HS onset (s)'	KO +PDBu' 500mM	0.912939	0.140004	0.946754	0.0672588	3	12		[]	[]	[]
'Time-to-peak (s)'	WT -PDBu' 250mM	2.26705	0.21	2.23522	0.0850208	3	14	Wilcoxon signed rank test	0.000366211	[]	103
'Time-to-peak (s)'	WT +PDBu' 250mM	1.93695	0.2608	1.84626	0.0856089	3	14		[]	[]	[]
'Time-to-peak (s)'	WT -PDBu' 500mM	1.35325	0.18105	1.36977	0.0511953	3	14	Wilcoxon signed rank test	0.0134277	[]	91
'Time-to-peak (s)'	WT +PDBu' 500mM	1.0967	0.18565	1.19476	0.0695139	3	14		[]	[]	[]
'Time-to-peak (s)'	KO -PDBu' 250mM	2.1241	0.11565	2.18242	0.114766	3	12	Wilcoxon signed rank test	0.000488281	[]	78
'Time-to-peak (s)'	KO +PDBu' 250mM	1.37635	0.05975	1.42	0.0766217	3	12		[]	[]	[]
'Time-to-peak (s)'	KO -PDBu' 500mM	1.4065	0.16855	1.43955	0.0658076	3	12	Wilcoxon signed rank test	0.000976562	[]	77
'Time-to-peak (s)'	KO +PDBu' 500mM	1.09185	0.19925	1.11945	0.0720167	3	12		[]	[]	[]
'Time-to-peak - delay (s)'	WT -PDBu' 250mM	0.887164	0.183997	0.931754	0.0858068	3	14	Wilcoxon signed rank test	0.000244141	[]	104
'Time-to-peak - delay (s)'	WT +PDBu' 250mM	0.666167	0.0931718	0.728943	0.0531904	3	14		[]	[]	[]
'Time-to-peak - delay (s)'	WT -PDBu' 500mM	0.193863	0.0417497	0.189507	0.0156825	3	14	Wilcoxon signed rank test	0.00524902	[]	95
'Time-to-peak - delay (s)'	WT +PDBu' 500mM	0.119903	0.0384574	0.129612	0.024586	3	14		[]	[]	[]
'Time-to-peak - delay (s)'	KO -PDBu' 250mM	1.09475	0.074216	1.11256	0.090226	3	12	Wilcoxon signed rank test	0.000488281	[]	78
'Time-to-peak - delay (s)'	KO +PDBu' 250mM	0.703451	0.0573517	0.715373	0.0355615	3	12		[]	[]	[]
'Time-to-peak - delay (s)'	KO -PDBu' 500mM	0.2577	0.049529	0.238768	0.0207222	3	12	Wilcoxon signed rank test	0.0341797	[]	66
'Time-to-peak - delay (s)'	KO +PDBu' 500mM	0.162567	0.0550578	0.172696	0.0324428	3	12		[]	[]	[]
