# Supplementary material for: Post-tetanic potentiation lowers the energy barrier for synaptic vesicle fusion independently of Synaptotagmin-1
Source: eLife. 2020 Aug 24;9:e55713. doi: 10.7554/eLife.55713 (PMC7500951; doi:10.7554/eLife.55713)
Supplement: Figure 6—source data 1. [file elife-55713-fig6-data1.xlsx]

## Sheet: Sheet1
Figure	Genotype	Median	MAD	Mean	SEM	N (weeks)	n (cells)	Primary test	pValue	zval	rank	Between groups test (when applicable)	pValue	zval	rank
Figure 6
'mEPSC frequency (Hz)'	WT -PDBu'	6.2	3.8	9.7	2.50476	3	13	Wilcoxon signed rank test	0.000244141		0	Wilcoxon rank sum test	0.0132928	-2.47583	123
'mEPSC frequency (Hz)'	WT +PDBu'	36.1	21.2	37.7769	7.55246	3	13					Wilcoxon rank sum test	0.0179772	-2.36609	125
'mEPSC frequency (Hz)'	KO -PDBu'	28.05	17.35	30.2833	6.24416	3	12	Wilcoxon signed rank test	0.000488281		0
'mEPSC frequency (Hz)'	KO +PDBu'	68.9	21.55	69.675	8.9465	3	12
'RRP (nC)'	WT -PDBu'	1.08086	0.561687	1.51518	0.344772	3	14	Wilcoxon signed rank test	0.951538		51	Wilcoxon rank sum test	0.368066	0.900103	207
'RRP (nC)'	WT +PDBu'	1.20323	0.555609	1.47722	0.305669	3	14					Wilcoxon rank sum test	0.14268	1.46588	218
'RRP (nC)'	KO -PDBu'	1.01186	0.380576	0.970155	0.160296	3	12	Wilcoxon signed rank test	0.569336		47
'RRP (nC)'	KO +PDBu'	0.871185	0.26891	0.934121	0.172189	3	12
'Release_{250} / Pool_{500}'	WT -PDBu'	0.629629	0.157631	0.622174	0.046916	3	14	Wilcoxon signed rank test	0.000610352		3	Wilcoxon rank sum test	0.0604691	1.87736	226
'Release_{250} / Pool_{500}'	WT +PDBu'	0.770721	0.0828107	0.746583	0.0337353	3	14					Wilcoxon rank sum test	0.425315	0.797234	205
'Release_{250} / Pool_{500}'	KO -PDBu'	0.455245	0.0976626	0.495699	0.0463529	3	12	Wilcoxon signed rank test	0.000976562		1
'Release_{250} / Pool_{500}'	KO +PDBu'	0.722726	0.0829026	0.720857	0.0341869	3	12
'0mM k_{2,max} (s^{-1})'	WT -PDBu'	0.000380507	0.000225681	0.000501874	0.000101592	3	13	Wilcoxon signed rank test	0.000244141		0
'0mM k_{2,max} (s^{-1})'	WT +PDBu'	0.0017216	0.000933676	0.00213924	0.000419336	3	13
'250mM k_{2,max} (s^{-1})'	WT -PDBu'	0.27869	0.116286	0.273901	0.0351259	3	14	Wilcoxon signed rank test	0.00012207		0
'250mM k_{2,max} (s^{-1})'	WT +PDBu'	0.489538	0.101025	0.513819	0.0745106	3	14
'500mM k_{2,max} (s^{-1})'	WT -PDBu'	2.75436	0.803157	3.19854	0.301948	3	14	Wilcoxon signed rank test	0.000610352		3
'500mM k_{2,max} (s^{-1})'	WT +PDBu'	4.73582	1.131	4.85012	0.480938	3	14
'0mM ΔE_a (RT)'	WT -PDBu'	-0.0416635	0.72819	0	0.253331	3	13	Wilcoxon signed rank test	0.000244141
'0mM ΔE_a (RT)'	WT +PDBu'	-1.55144	0.547856	-1.44986	0.262183	3	13
'250mM ΔE_a (RT)'	WT -PDBu'	-6.4438	0.404225	-6.30217	0.144727	3	14	Wilcoxon signed rank test	0.00012207
'250mM ΔE_a (RT)'	WT +PDBu'	-6.99628	0.211216	-6.93128	0.130023	3	14
'500mM ΔE_a (RT)'	WT -PDBu'	-8.66738	0.285115	-8.75986	0.0937533	3	14	Wilcoxon signed rank test	0.000610352
'500mM ΔE_a (RT)'	WT +PDBu'	-9.23382	0.233361	-9.17617	0.122109	3	14
'0mM k_{2,max} (s^{-1})'	KO -PDBu'	0.0021045	0.00111687	0.00323784	0.000861356	3	12	Wilcoxon signed rank test	0.000488281		0
'0mM k_{2,max} (s^{-1})'	KO +PDBu'	0.00676139	0.00266099	0.00798132	0.00168423	3	12
'250mM k_{2,max} (s^{-1})'	KO -PDBu'	0.141657	0.0414192	0.203067	0.0375072	3	12	Wilcoxon signed rank test	0.0209961		10
'250mM k_{2,max} (s^{-1})'	KO +PDBu'	0.352884	0.0859491	0.367038	0.0386744	3	12
'500mM k_{2,max} (s^{-1})'	KO -PDBu'	2.08838	0.430936	2.44526	0.259129	3	12	Wilcoxon signed rank test	0.0268555		11
'500mM k_{2,max} (s^{-1})'	KO +PDBu'	3.49265	1.01218	3.77928	0.462677	3	12
'0mM ΔE_a (RT)'	KO -PDBu'	0.022968	0.635521	0	0.287353	3	12	Wilcoxon signed rank test	0.000488281
'0mM ΔE_a (RT)'	KO +PDBu'	-0.970289	0.477496	-0.902199	0.214008	3	12
'250mM ΔE_a (RT)'	KO -PDBu'	-3.92889	0.285748	-4.13863	0.157193	3	12	Wilcoxon signed rank test	0.0209961
'250mM ΔE_a (RT)'	KO +PDBu'	-4.75225	0.225929	-4.73056	0.109001	3	12
'500mM ΔE_a (RT)'	KO -PDBu'	-6.5234	0.229737	-6.627	0.0991788	3	12	Wilcoxon signed rank test	0.0268555
'500mM ΔE_a (RT)'	KO +PDBu'	-7.08584	0.254606	-7.06238	0.148131	3	12
