# Supplementary material for: Post-tetanic potentiation lowers the energy barrier for synaptic vesicle fusion independently of Synaptotagmin-1
Source: eLife. 2020 Aug 24;9:e55713. doi: 10.7554/eLife.55713 (PMC7500951; doi:10.7554/eLife.55713)
Supplement: Figure 7—figure supplement 1—source data 1. [file elife-55713-fig7-figsupp1-data1.xlsx]

## Sheet: Sheet1
Figure	Genotype	Median	MAD	Mean	SEM	N (weeks)	n (cells)	Primary test	pValue	zval	rank	Between groups test (when applicable)	pValue	zval	rank
Figure 7 Supplement 1
Parameter	Value
RRP	15000
k_on	100000000
k_off	4000
b	0.5
l_+	0.00026667
f	31.3
l_+,new	0.0014919
f_D232N	62.6
Linear fit	Value
Slope_WT	3.579
Intercept_WT	24.35
Slope_l+,new	3.286
Intercept_l+,new	23.11
Slope_f_D232N	3.297
Intercept_f_D232N	23.3
