# Supplementary figures and images for: Post-tetanic potentiation lowers the energy barrier for synaptic vesicle fusion independently of Synaptotagmin-1
Source: eLife journal article supplement (doi:10.7554/elife.55713), 2020-08-24

Figure 3 Supplementary 1

**A**

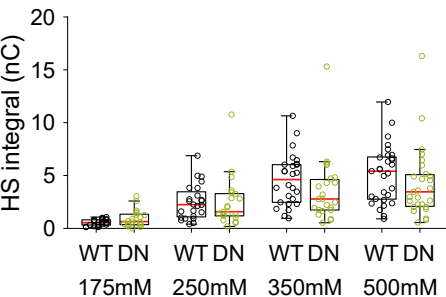

**B**

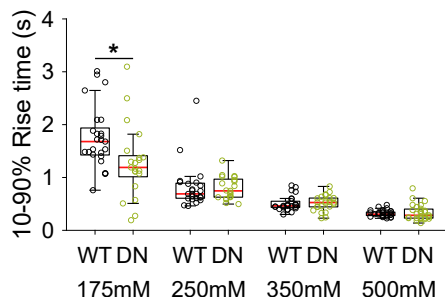

**C**

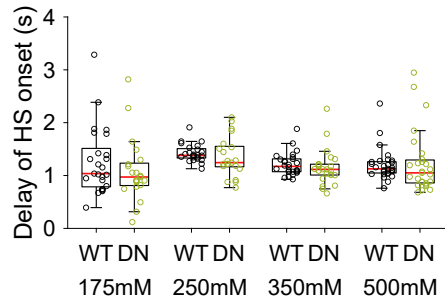

**D**

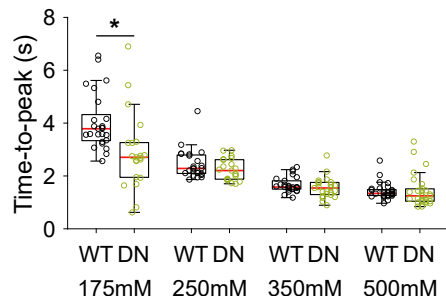

**E**

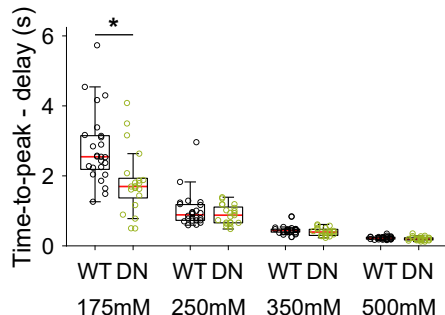

Supplement: supp [file elife-55713-supp-v1.zip]

Figure 4 Supplementary 1

**A**

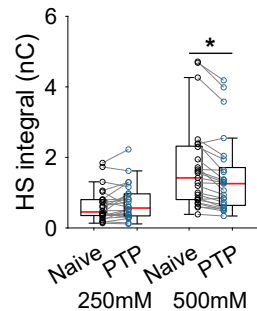

**B**

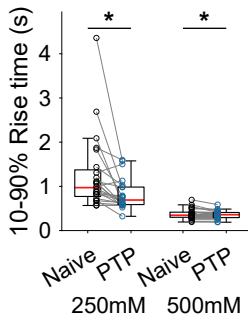

**C**

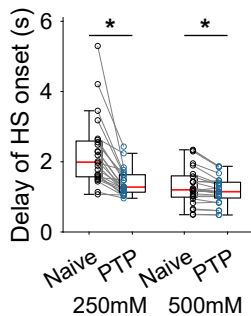

**D**

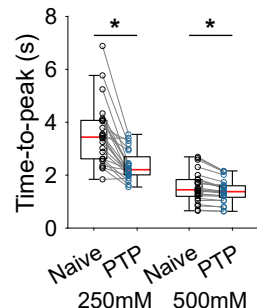

**E**

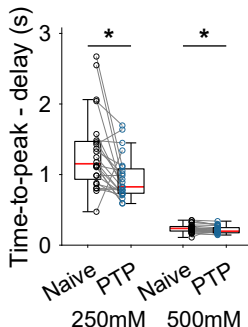

Supplement: supp [file elife-55713-supp-v1.zip]

Figure 2 Supplementary 2

**A**

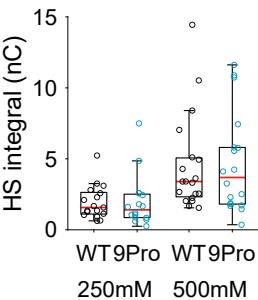

**B**

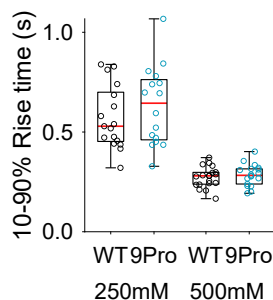

**C**

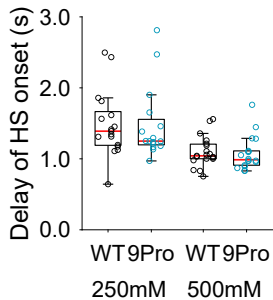

**D**

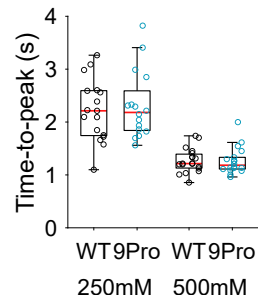

**E**

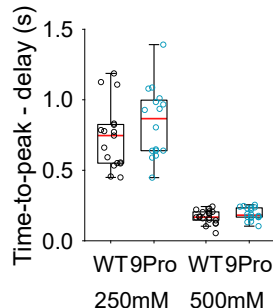

Supplement: supp [file elife-55713-supp-v1.zip]

Figure 7 Supplementry 1

**A**

$I_{+,new}$

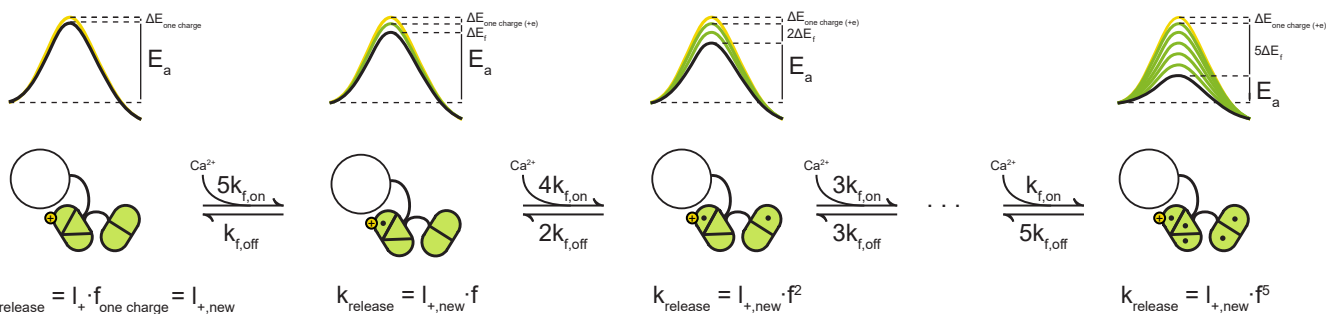

$f_{\text{D232N}}$

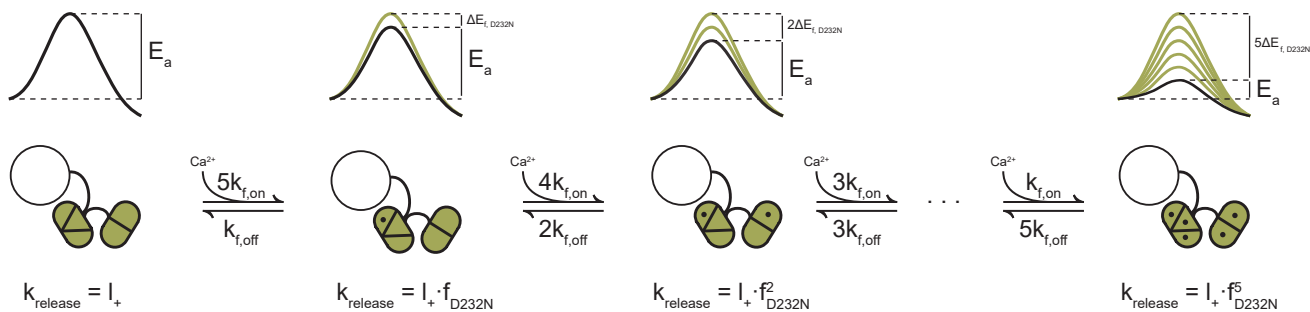

**B**

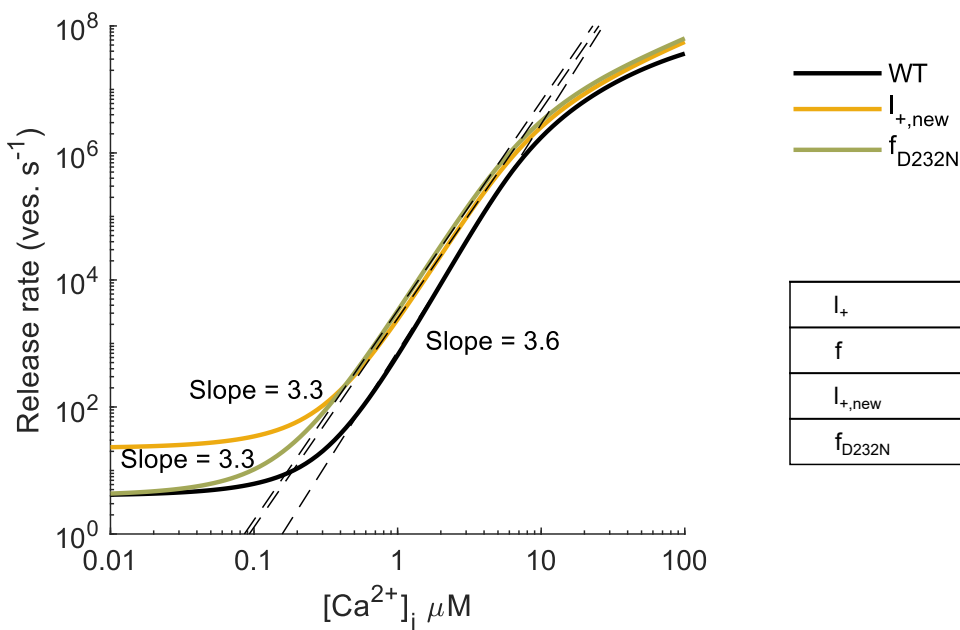

|                    |          |
|--------------------|----------|
| $I_{+}$            | 0.000267 |
| $f$                | 31.3     |
| $I_{+,new}$        | 0.00149  |
| $f_{\text{D232N}}$ | 62.6     |

Supplement: supp [file elife-55713-supp-v1.zip]

Figure 3 Supplementary 3

**A**

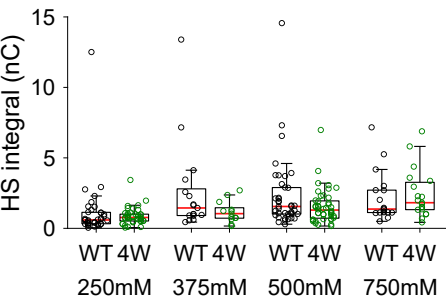

**B**

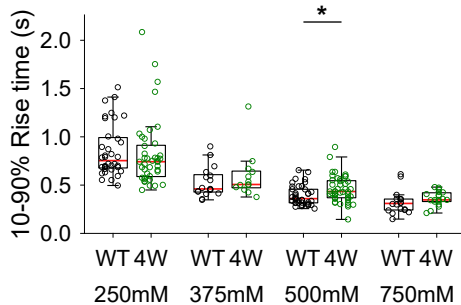

**C**

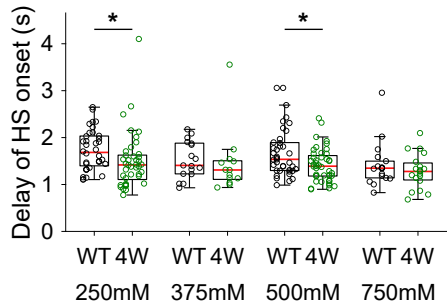

**D**

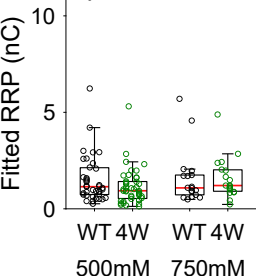

**E**

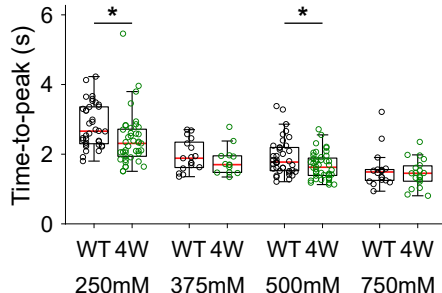

**F**

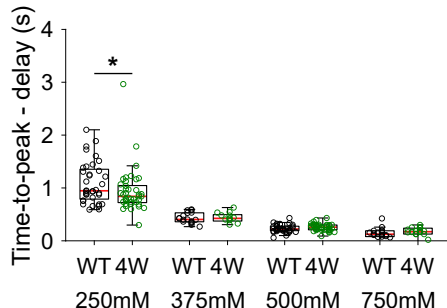

Supplement: supp [file elife-55713-supp-v1.zip]

Figure 2 Supplementary 1

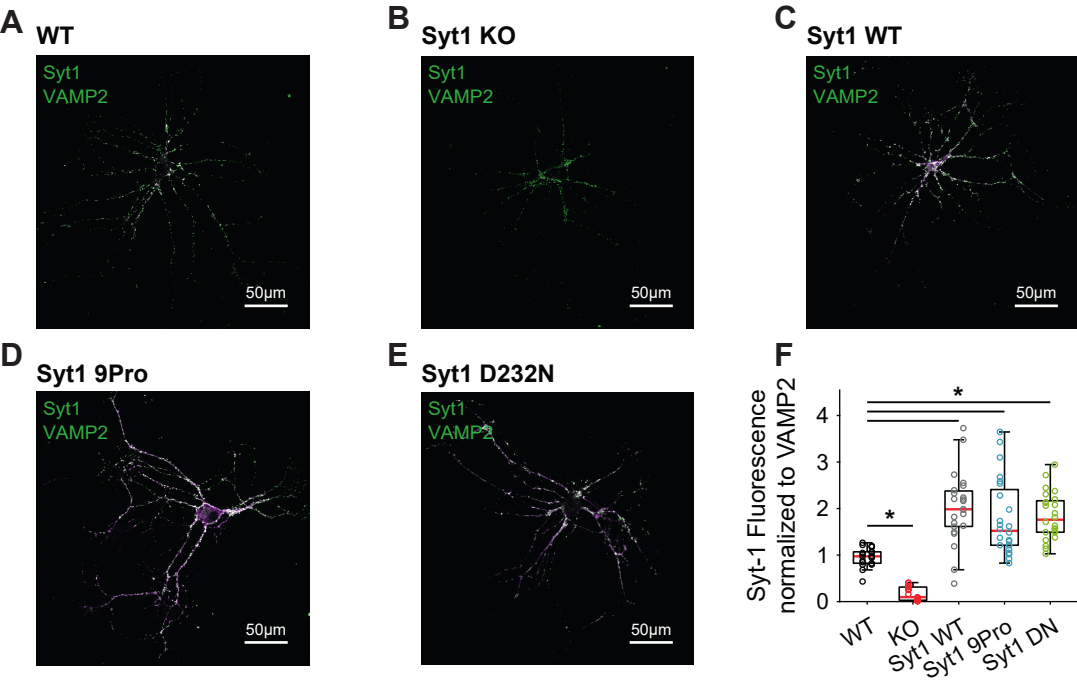

Supplement: supp [file elife-55713-supp-v1.zip]

Figure 6 Supplementary 1

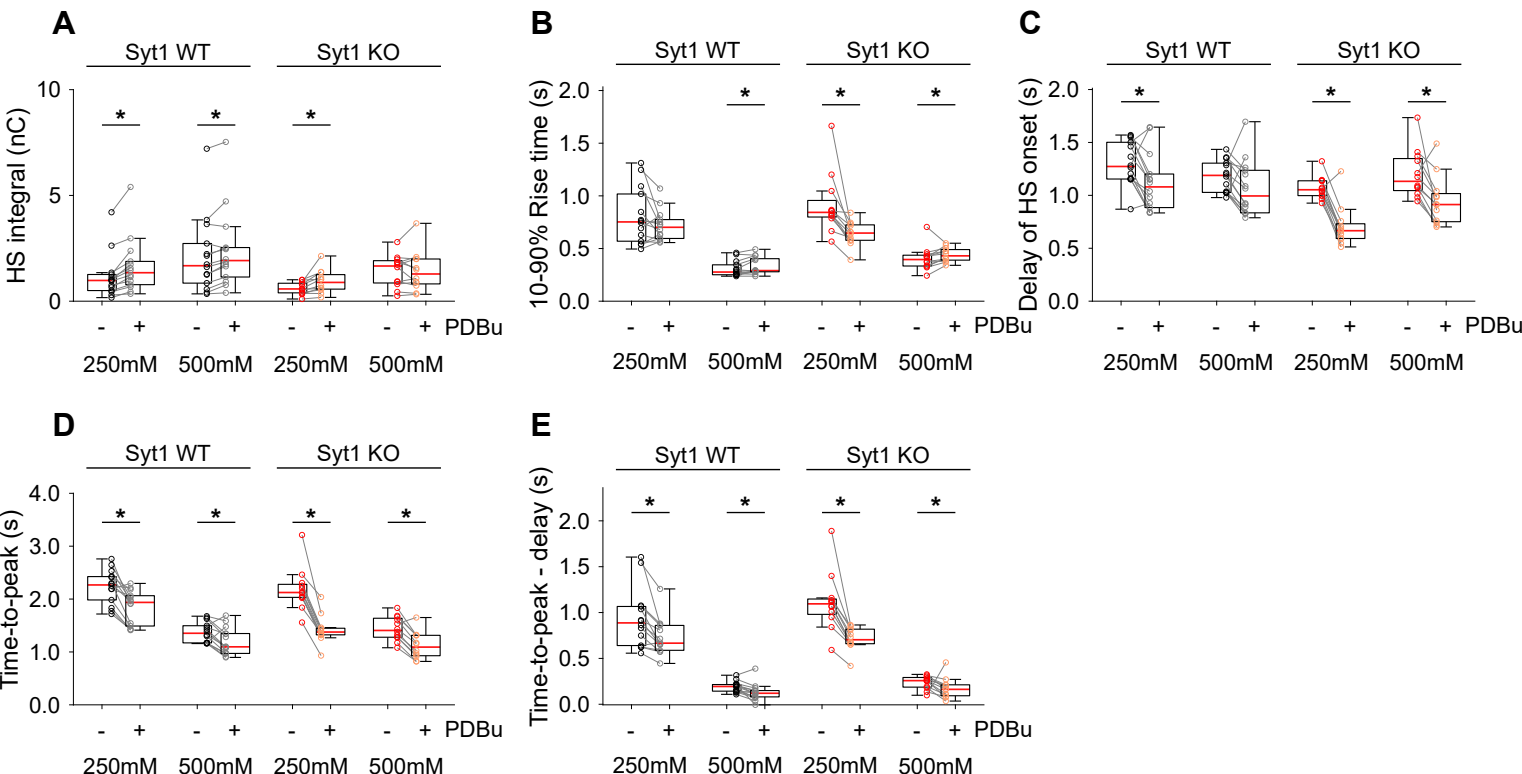

Supplement: supp [file elife-55713-supp-v1.zip]

Figure 3 Supplementary Data 2

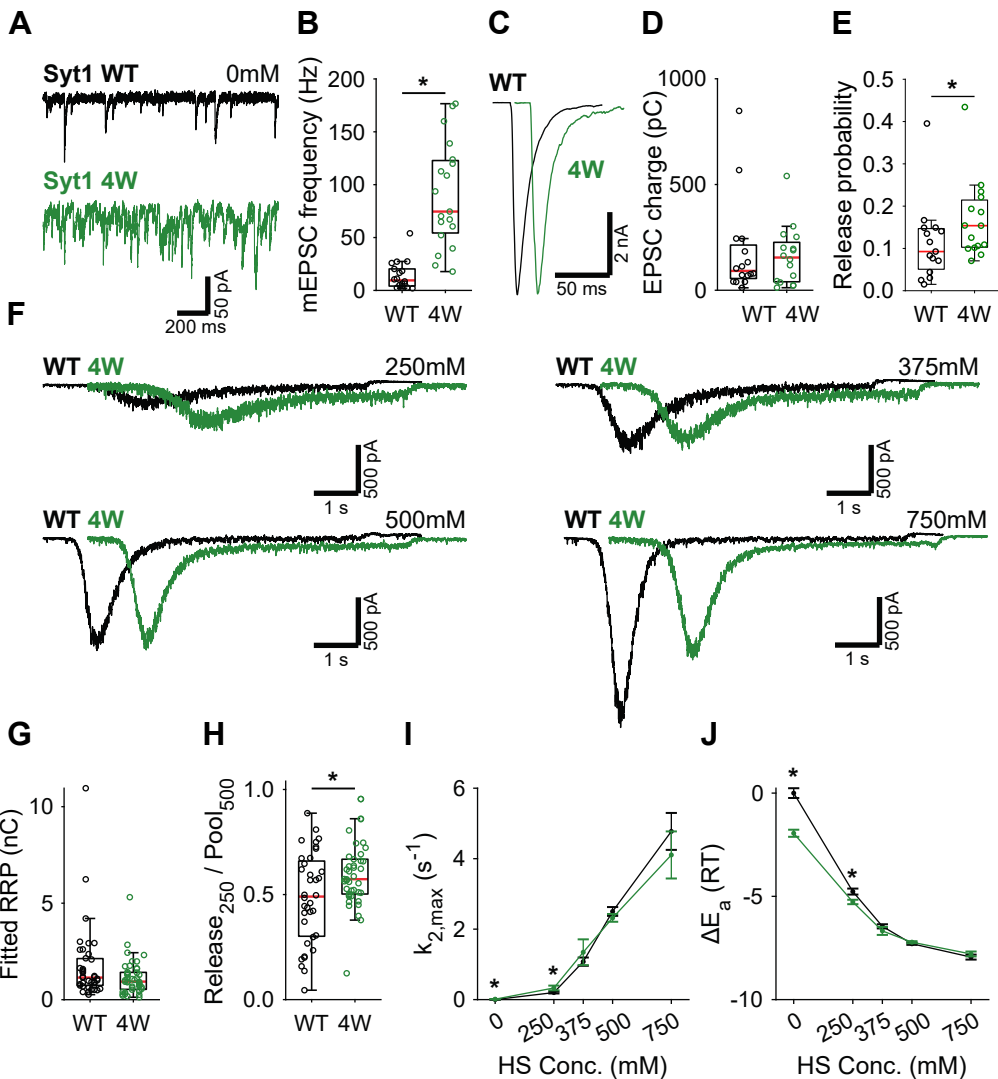

Supplement: supp [file elife-55713-supp-v1.zip]

Figure 1 Supplementary 2

**A**

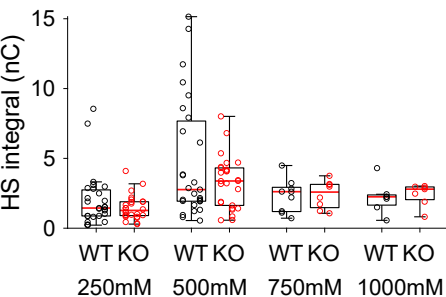

**B**

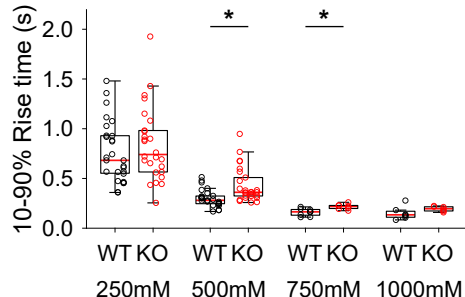

**C**

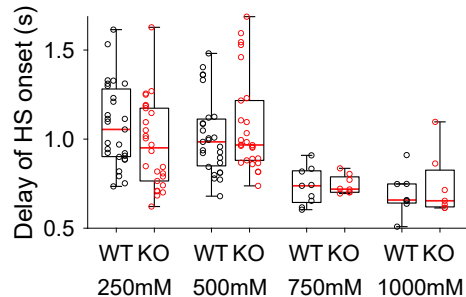

**D**

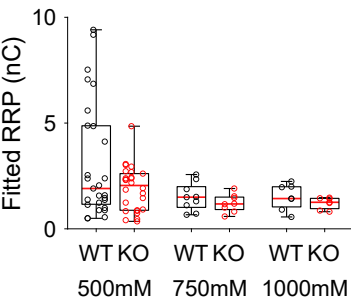

**E**

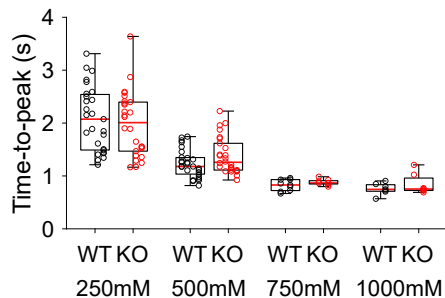

**F**

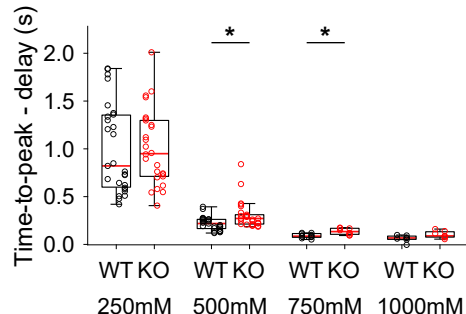

Supplement: supp [file elife-55713-supp-v1.zip]

Figure 5 Supplementary 1

**A**

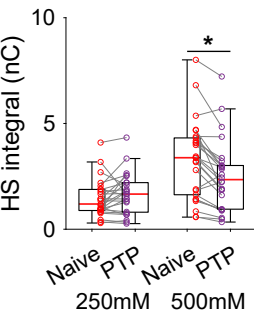

**B**

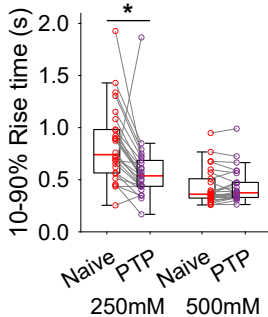

**C**

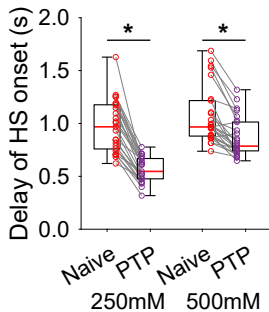

**D**

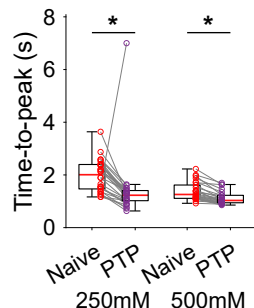

**E**

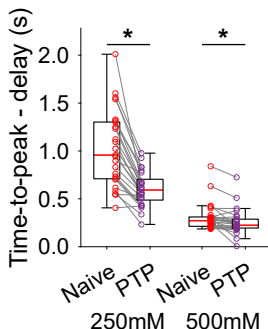

Supplement: supp [file elife-55713-supp-v1.zip]

Figure 1 Supplementary 1

**A**

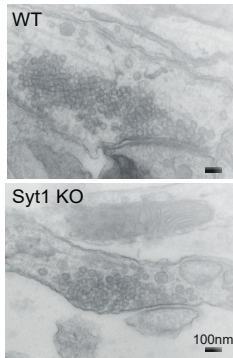

**B**

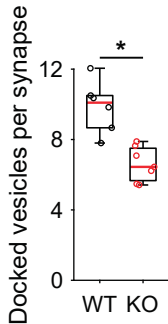

**C**

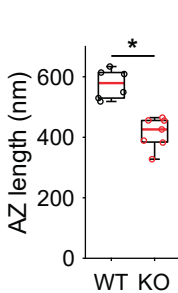

**D**

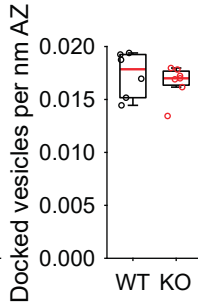

**E**

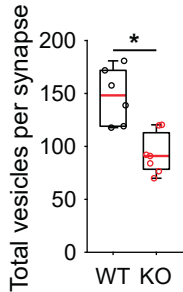

Supplement: supp [file elife-55713-supp-v1.zip]
